# Supplementary material for: Radii-dependent self-assembly of chiral lanthanide complexes: synthesis, chirality, and single-molecule magnet behavior
Source: Royal Society of Chemistry journal article supplement (doi:10.1039/d0dt01711f), 2020-01-01
Supplement: d0dt01711f1.pdf [file d0dt01711f1.pdf]

## Supporting Information

### Radii-Dependent Self-Assembly of Chiral Lanthanide Complexes:

#### Synthetic, Chiroptical, and Single-molecule Magnet Behavior

Ge Li,<sup>a</sup> Xiaoxi Zhao,<sup>a</sup> Qingxin Han,<sup>c</sup> Li Wang,<sup>\*b</sup> Weisheng Liu<sup>\*a</sup>

*a.* Key Laboratory of Nonferrous Metals Chemistry and Resources Utilization of Gansu Province and State Key Laboratory of Applied Organic Chemistry, College of Chemistry and Chemical Engineering, Lanzhou University, Lanzhou 730000, P. R.China

*b.* College of Chemistry and Chemical Engineering, Xi'an Shiyou University, Xi'an 710065, P.R. China

*c.* College of Bioresources Chemistry and Materials Engineering, Shaanxi University of Science and Technology, Xi'an 710021, China

E/mail: liuws@lzu.edu.cn, lwang2018@xsyu.edu.cn

**Table S1** Crystal Data and Structure Refinement Parameters for Complexes.

|                                            | Complex 1a                                                                        | Complex 1b                                                                        | Complex 2a                                                                        | Complex 2b                                                                        |
|--------------------------------------------|-----------------------------------------------------------------------------------|-----------------------------------------------------------------------------------|-----------------------------------------------------------------------------------|-----------------------------------------------------------------------------------|
| Formula                                    | C <sub>104</sub> H <sub>116</sub> La <sub>3</sub> N <sub>17</sub> O <sub>34</sub> | C <sub>104</sub> H <sub>114</sub> La <sub>3</sub> N <sub>17</sub> O <sub>34</sub> | C <sub>108</sub> H <sub>120</sub> Dy <sub>5</sub> N <sub>17</sub> O <sub>36</sub> | C <sub>112</sub> H <sub>126</sub> Dy <sub>5</sub> N <sub>19</sub> O <sub>36</sub> |
| Formula Weight                             | 2564.86                                                                           | 2562.85                                                                           | 3044.70                                                                           | 3126.81                                                                           |
| Crystal System                             | Orthorhombic                                                                      | Orthorhombic                                                                      | Tetragonal                                                                        | Tetragonal                                                                        |
| Space Group                                | P2 <sub>1</sub> 2 <sub>1</sub> 2 <sub>1</sub>                                     | P2 <sub>1</sub> 2 <sub>1</sub> 2 <sub>1</sub>                                     | P4 <sub>2</sub> 2 <sub>1</sub> 2                                                  | P4 <sub>2</sub> 2 <sub>1</sub> 2                                                  |
| a (Å)                                      | 14.6618(10)                                                                       | 14.6403(11)                                                                       | 28.2725(12)                                                                       | 28.2054(4)                                                                        |
| b (Å)                                      | 26.2233 (10)                                                                      | 26.197(2)                                                                         | 28.2725(12)                                                                       | 28.2054(4)                                                                        |
| c (Å)                                      | 29.3764(10)                                                                       | 29.383(2)                                                                         | 18.1870(7)                                                                        | 18.1449(3)                                                                        |
| α (°)                                      | 90                                                                                | 90                                                                                | 90                                                                                | 90                                                                                |
| β (°)                                      | 90                                                                                | 90                                                                                | 90                                                                                | 90                                                                                |
| γ (°)                                      | 90                                                                                | 90                                                                                | 90                                                                                | 90                                                                                |
| Z                                          | 4                                                                                 | 4                                                                                 | 4                                                                                 | 4                                                                                 |
| Flack parameter                            | -0.0055(14)                                                                       | 0.002(4)                                                                          | -0.009(9)                                                                         | -0.003(3)                                                                         |
| Volume (Å <sup>3</sup> )                   | 11294.66(10)                                                                      | 11269.5(15)                                                                       | 14537.5(14)                                                                       | 14435.1(5)                                                                        |
| ρ <sub>calc</sub> (g/cm <sup>3</sup> )     | 1.508                                                                             | 1.511                                                                             | 1.391                                                                             | 1.439                                                                             |
| Absorption coefficient (mm <sup>-1</sup> ) | 9.335                                                                             | 1.203                                                                             | 2.609                                                                             | 14.212                                                                            |
| F(000)                                     | 5208                                                                              | 5200                                                                              | 6020                                                                              | 6196                                                                              |
| Temperature                                | 293 K                                                                             | 296.15 K                                                                          | 298 K                                                                             | 120 K                                                                             |
| Reflections collected                      | 142478                                                                            | 62056                                                                             | 31737                                                                             | 49240                                                                             |
| Independent ref.                           | 22207                                                                             | 22165                                                                             | 12403                                                                             | 14157                                                                             |
| Data/restraints/parameters                 | 22207/97/1470                                                                     | 22165/80/1461                                                                     | 12403/249/783                                                                     | 14157/201/811                                                                     |
| R <sub>int</sub>                           | 0.0752                                                                            | 0.0348                                                                            | 0.0644                                                                            | 0.0538                                                                            |
| Final R indices [I>2.0σ(I)]                | R <sub>1</sub> = 0.0387, wR <sub>2</sub> = 0.1022                                 | R <sub>1</sub> = 0.0327, wR <sub>2</sub> = 0.0812                                 | R <sub>1</sub> = 0.0699, wR <sub>2</sub> = 0.1331                                 | R <sub>1</sub> = 0.0587, wR <sub>2</sub> = 0.1466                                 |

|                            |                                                   |                                                   |                                                   |                                                   |
|----------------------------|---------------------------------------------------|---------------------------------------------------|---------------------------------------------------|---------------------------------------------------|
| Final R indexes [all data] | R <sub>1</sub> = 0.0398, wR <sub>2</sub> = 0.1028 | R <sub>1</sub> = 0.0369, wR <sub>2</sub> = 0.0833 | R <sub>1</sub> = 0.0984, wR <sub>2</sub> = 0.1484 | R <sub>1</sub> = 0.0888, wR <sub>2</sub> = 0.1661 |
| GOF                        | 1.022                                             | 1.062                                             | 1.046                                             | 0.969                                             |

**Table S2** Selected Bond Lengths (Å) and Angles (°) for All Complexes.

| Complex <b>1a</b> |            |                   |            |                   |            |
|-------------------|------------|-------------------|------------|-------------------|------------|
| La(1)-O(2)        | 2.428(4)   | La(2)-O(5)        | 2.764(5)   | La(3)-O(9)        | 2.616(5)   |
| La(1)-O(3)        | 2.578(5)   | La(2)-O(6)        | 2.466(4)   | La(3)-O(10)       | 2.562(4)   |
| La(1)-O(6)        | 2.470(4)   | La(2)-O(10)       | 2.689(4)   | La(3)-O(15)       | 2.618(4)   |
| La(1)-O(7)        | 2.588(5)   | La(2)-O(11)       | 2.591(4)   | La(3)-O(16)       | 2.597(5)   |
| La(1)-O(11)       | 2.613(5)   | La(2)-O(14)       | 2.665(5)   | La(3)-O(18)       | 2.465(4)   |
| La(1)-O(12)       | 2.672(4)   | La(2)-O(15)       | 2.595(4)   | La(3)-O(19)       | 2.585(4)   |
| La(1)-O(13)       | 2.639(5)   | La(2)-O(17)       | 2.748(4)   | La(3)-O(22)       | 2.462(4)   |
| La(1)-O(14)       | 2.574(5)   | La(2)-O(18)       | 2.453(4)   | La(3)-O(23)       | 2.599(4)   |
| La(1)-N(1)        | 2.855(6)   | La(2)-N(5)        | 2.637(6)   | La(3)-N(9)        | 2.782(6)   |
| La(1)-N(3)        | 2.804(5)   | La(2)-N(8)        | 2.613(6)   | La(3)-N(11)       | 2.809(6)   |
|                   |            |                   |            |                   |            |
| O(2)-La(1)-O(3)   | 111.62(16) | O(6)-La(2)-O(5)   | 59.32(14)  | O(9)-La(3)-O(15)  | 110.51(14) |
| O(2)-La(1)-O(6)   | 168.40(17) | O(6)-La(2)-O(10)  | 138.75(14) | O(9)-La(3)-N(9)   | 144.14(16) |
| O(2)-La(1)-O(7)   | 70.97(18)  | O(6)-La(2)-O(11)  | 71.88(14)  | O(9)-La(3)-N(11)  | 86.87(15)  |
| O(2)-La(1)-O(11)  | 110.05(15) | O(6)-La(2)-O(14)  | 65.67(14)  | O(10)-La(3)-O(9)  | 61.20(14)  |
| O(2)-La(1)-O(12)  | 57.97(15)  | O(6)-La(2)-O(15)  | 120.78(14) | O(10)-La(3)-O(15) | 61.28(14)  |
| O(2)-La(1)-O(13)  | 75.74(17)  | O(6)-La(2)-O(17)  | 73.42(14)  | O(10)-La(3)-O(16) | 78.06(15)  |
| O(2)-La(1)-O(14)  | 124.17(16) | O(6)-La(2)-N(5)   | 132.29(15) | O(10)-La(3)-O(19) | 137.96(14) |
| O(2)-La(1)-N(1)   | 61.37(16)  | O(6)-La(2)-N(8)   | 123.82(17) | O(10)-La(3)-O(23) | 80.97(14)  |
| O(2)-La(1)-N(3)   | 107.58(16) | O(10)-La(2)-O(5)  | 118.24(13) | O(10)-La(3)-N(9)  | 129.15(15) |
| O(3)-La(1)-O(7)   | 128.08(16) | O(10)-La(2)-O(17) | 74.75(14)  | O(10)-La(3)-N(11) | 136.37(15) |
| O(3)-La(1)-O(11)  | 136.76(15) | O(11)-La(2)-O(5)  | 124.17(14) | O(15)-La(3)-N(9)  | 102.47(15) |
| O(3)-La(1)-O(12)  | 141.17(15) | O(11)-La(2)-O(10) | 116.04(14) | O(15)-La(3)-N(11) | 161.43(15) |
| O(3)-La(1)-O(13)  | 69.28(15)  | O(11)-La(2)-O(14) | 61.08(14)  | O(16)-La(3)-O(9)  | 73.07(16)  |
| O(3)-La(1)-N(1)   | 57.57(16)  | O(11)-La(2)-O(15) | 165.73(13) | O(16)-La(3)-O(15) | 59.97(14)  |
| O(3)-La(1)-N(3)   | 73.92(16)  | O(11)-La(2)-O(17) | 64.72(13)  | O(16)-La(3)-O(23) | 139.92(15) |
| O(6)-La(1)-O(3)   | 70.13(15)  | O(11)-La(2)-N(5)  | 60.86(15)  | O(16)-La(3)-N(9)  | 138.60(16) |
| O(6)-La(1)-O(7)   | 98.71(16)  | O(11)-La(2)-N(8)  | 107.45(15) | O(16)-La(3)-N(11) | 122.63(15) |
| O(6)-La(1)-O(11)  | 71.45(14)  | O(14)-La(2)-O(5)  | 74.66(14)  | O(18)-La(3)-O(9)  | 116.81(15) |
| O(6)-La(1)-O(12)  | 128.25(14) | O(14)-La(2)-O(10) | 155.24(14) | O(18)-La(3)-O(10) | 67.86(14)  |
| O(6)-La(1)-O(13)  | 114.87(15) | O(14)-La(2)-O(17) | 119.26(14) | O(18)-La(3)-O(15) | 70.84(14)  |
| O(6)-La(1)-O(14)  | 67.06(14)  | O(15)-La(2)-O(5)  | 64.59(13)  | O(18)-La(3)-O(16) | 129.29(14) |
| O(6)-La(1)-N(1)   | 113.67(15) | O(15)-La(2)-O(10) | 59.93(13)  | O(18)-La(3)-O(19) | 100.08(14) |

|                   |            |                   |            |                   |            |
|-------------------|------------|-------------------|------------|-------------------|------------|
| O(6)-La(1)-N(3)   | 61.38(15)  | O(15)-La(2)-O(14) | 116.05(14) | O(18)-La(3)-O(23) | 70.63(14)  |
| O(7)-La(1)-O(11)  | 76.75(15)  | O(15)-La(2)-O(17) | 123.10(14) | O(18)-La(3)-N(9)  | 61.36(15)  |
| O(7)-La(1)-O(12)  | 86.34(15)  | O(15)-La(2)-N(5)  | 106.93(15) | O(18)-La(3)-N(11) | 107.87(15) |
| O(7)-La(1)-O(13)  | 146.37(15) | O(15)-La(2)-N(8)  | 60.82(15)  | O(19)-La(3)-O(9)  | 142.89(15) |
| O(7)-La(1)-N(1)   | 85.42(16)  | O(17)-La(2)-O(5)  | 119.07(13) | O(19)-La(3)-O(15) | 76.68(14)  |
| O(7)-La(1)-N(3)   | 57.54(15)  | O(18)-La(2)-O(5)  | 72.74(14)  | O(19)-La(3)-O(16) | 80.81(15)  |
| O(11)-La(1)-O(12) | 59.66(13)  | O(18)-La(2)-O(6)  | 75.37(14)  | O(19)-La(3)-O(23) | 134.88(15) |
| O(11)-La(1)-O(13) | 111.22(14) | O(18)-La(2)-O(10) | 66.00(14)  | O(19)-La(3)-N(9)  | 58.04(15)  |
| O(11)-La(1)-N(1)  | 162.09(15) | O(18)-La(2)-O(11) | 120.69(13) | O(19)-La(3)-N(11) | 85.49(15)  |
| O(11)-La(1)-N(3)  | 103.93(14) | O(18)-La(2)-O(14) | 138.17(14) | O(22)-La(3)-O(9)  | 73.24(15)  |
| O(12)-La(1)-N(1)  | 118.08(15) | O(18)-La(2)-O(15) | 71.44(14)  | O(22)-La(3)-O(10) | 125.84(14) |
| O(12)-La(1)-N(3)  | 143.68(15) | O(18)-La(2)-O(17) | 59.16(13)  | O(22)-La(3)-O(15) | 115.91(15) |
| O(13)-La(1)-O(12) | 71.89(15)  | O(18)-La(2)-N(5)  | 123.26(16) | O(22)-La(3)-O(16) | 61.19(15)  |
| O(13)-La(1)-N(1)  | 82.84(16)  | O(18)-La(2)-N(8)  | 131.85(15) | O(22)-La(3)-O(18) | 166.16(14) |
| O(13)-La(1)-N(3)  | 141.13(15) | N(5)-La(2)-O(5)   | 160.06(15) | O(22)-La(3)-O(19) | 71.18(15)  |
| O(14)-La(1)-O(3)  | 85.06(16)  | N(5)-La(2)-O(10)  | 65.72(15)  | O(22)-La(3)-O(23) | 107.50(15) |
| O(14)-La(1)-O(7)  | 138.68(16) | N(5)-La(2)-O(14)  | 95.03(15)  | O(22)-La(3)-N(9)  | 104.85(16) |
| O(14)-La(1)-O(11) | 62.01(14)  | N(5)-La(2)-O(17)  | 80.83(15)  | O(22)-La(3)-N(11) | 61.63(16)  |
| O(14)-La(1)-O(12) | 75.56(14)  | N(8)-La(2)-O(5)   | 81.35(16)  | O(23)-La(3)-O(9)  | 66.91(15)  |
| O(14)-La(1)-O(13) | 60.77(15)  | N(8)-La(2)-O(10)  | 93.64(16)  | O(23)-La(3)-O(15) | 133.70(14) |
| O(14)-La(1)-N(1)  | 135.88(16) | N(8)-La(2)-O(14)  | 66.29(16)  | O(23)-La(3)-N(9)  | 80.35(15)  |
| O(14)-La(1)-N(3)  | 128.23(15) | N(8)-La(2)-O(17)  | 159.39(16) | O(23)-La(3)-N(11) | 58.32(15)  |

| <b>D—H···A</b>                      | <b>Distance(D—H)</b> | <b>Distance(H···A)</b> | <b>Distance (D···A)</b> | <b>Angles(D—H···A)</b> |
|-------------------------------------|----------------------|------------------------|-------------------------|------------------------|
| O(4)-H(4)...O(28)                   | 0.82                 | 1.86                   | 2.68(2)                 | 175.0                  |
| O(8)-H(8)...O(22) <sup>i</sup>      | 0.82                 | 1.92                   | 2.736(7)                | 172.7                  |
| O(20)-H(20)...N(6) <sup>ii</sup>    | 0.82                 | 2.04                   | 2.852(7)                | 172.0                  |
| O(24)-H(24)...O(33)                 | 0.82                 | 1.92                   | 2.714(9)                | 164.0                  |
| N(10)-H(10)...O(31) <sup>iii</sup>  | 0.86                 | 2.03                   | 2.844(11)               | 157.1                  |
| O(25)-H(25B)...O(26)                | 0.83                 | 2.05                   | 2.838(12)               | 158.4                  |
| O(26)-H(26A)...O(35)                | 0.86                 | 2.21                   | 2.989(17)               | 151.4                  |
| O(27)-H(27A)...N(16) <sup>iv</sup>  | 0.90                 | 2.04                   | 2.821(19)               | 144.5                  |
| O(31)-H(31A)...O(27) <sup>v</sup>   | 0.85                 | 2.27                   | 2.802(17)               | 120.5                  |
| O(31)-H(31B)...O(32)                | 0.81                 | 1.89                   | 2.675(17)               | 161.8                  |
| O(32)-H(32D)...N(14) <sup>iii</sup> | 0.88                 | 1.96                   | 2.81(3)                 | 161.9                  |
| O(32)-H(32E)...N(7) <sup>i</sup>    | 0.90                 | 1.89                   | 2.785(10)               | 176.8                  |
| O(33)-H(33A)...O(35)                | 0.85                 | 2.18                   | 2.840(13)               | 134.0                  |
| O(34)-H(34A)...O(36)                | 0.85                 | 1.78                   | 2.47(4)                 | 136.8                  |

|                                                                                                                                                                 |      |      |         |       |
|-----------------------------------------------------------------------------------------------------------------------------------------------------------------|------|------|---------|-------|
| O(35)-H(35A)...O(28) <sup>v</sup>                                                                                                                               | 0.86 | 2.02 | 2.81(2) | 153.0 |
| O(36)-H(36A)...O(32)                                                                                                                                            | 0.80 | 2.11 | 2.88(2) | 162.2 |
| Symmetry codes: (i) $-x-3/2, -y-1, z+1/2$ ; (ii) $-x-2, y-1/2, -z-3/2$ ; (iii) $x-1/2, -y-3/2, -z-1$ ; (iv) $-x-1, y-1/2, -z-3/2$ ; (v) $x+1/2, -y-3/2, -z-1$ . |      |      |         |       |

| Complex 1b       |            |                   |            |                   |            |
|------------------|------------|-------------------|------------|-------------------|------------|
| La(1)-O(2)       | 2.428(4)   | La(2)-O(5)        | 2.774(4)   | La(3)-O(9)        | 2.609(4)   |
| La(1)-O(3)       | 2.589(4)   | La(2)-O(6)        | 2.466(4)   | La(3)-O(10)       | 2.554(4)   |
| La(1)-O(6)       | 2.469(4)   | La(2)-O(10)       | 2.690(4)   | La(3)-O(15)       | 2.632(4)   |
| La(1)-O(7)       | 2.600(4)   | La(2)-O(11)       | 2.584(4)   | La(3)-O(16)       | 2.600(4)   |
| La(1)-O(11)      | 2.618(4)   | La(2)-O(14)       | 2.668(4)   | La(3)-O(18)       | 2.466(4)   |
| La(1)-O(12)      | 2.670(4)   | La(2)-O(15)       | 2.605(4)   | La(3)-O(19)       | 2.590(4)   |
| La(1)-O(13)      | 2.639(4)   | La(2)-O(17)       | 2.747(4)   | La(3)-O(22)       | 2.472(4)   |
| La(1)-O(14)      | 2.582(4)   | La(2)-O(18)       | 2.462(4)   | La(3)-O(23)       | 2.598(4)   |
| La(1)-N(1)       | 2.854(5)   | La(2)-N(5)        | 2.637(5)   | La(3)-N(9)        | 2.782(5)   |
| La(1)-N(3)       | 2.804(5)   | La(2)-N(8)        | 2.626(5)   | La(3)-N(11)       | 2.801(5)   |
| O(2)-La(1)-O(3)  | 111.84(15) | O(6)-La(2)-O(5)   | 59.28(12)  | O(9)-La(3)-O(15)  | 110.75(13) |
| O(2)-La(1)-O(6)  | 168.18(15) | O(6)-La(2)-O(10)  | 138.84(13) | O(9)-La(3)-N(9)   | 144.77(14) |
| O(2)-La(1)-O(7)  | 70.76(16)  | O(6)-La(2)-O(11)  | 71.64(13)  | O(9)-La(3)-N(11)  | 86.86(14)  |
| O(2)-La(1)-O(11) | 110.28(14) | O(6)-La(2)-O(14)  | 65.84(13)  | O(10)-La(3)-O(9)  | 61.71(13)  |
| O(2)-La(1)-O(12) | 58.21(13)  | O(6)-La(2)-O(15)  | 120.96(13) | O(10)-La(3)-O(15) | 61.43(12)  |
| O(2)-La(1)-O(13) | 75.46(15)  | O(6)-La(2)-O(17)  | 73.01(13)  | O(10)-La(3)-O(16) | 77.99(13)  |
| O(2)-La(1)-O(14) | 124.23(14) | O(6)-La(2)-N(5)   | 131.96(14) | O(10)-La(3)-O(19) | 137.36(13) |
| O(2)-La(1)-N(1)  | 61.36(15)  | O(6)-La(2)-N(8)   | 123.66(15) | O(10)-La(3)-O(23) | 80.71(13)  |
| O(2)-La(1)-N(3)  | 107.15(15) | O(10)-La(2)-O(5)  | 118.02(12) | O(10)-La(3)-N(9)  | 129.34(13) |
| O(3)-La(1)-O(7)  | 128.60(14) | O(10)-La(2)-O(17) | 75.03(13)  | O(10)-La(3)-N(11) | 136.24(14) |
| O(3)-La(1)-O(11) | 136.36(13) | O(11)-La(2)-O(5)  | 124.21(12) | O(15)-La(3)-N(9)  | 102.04(13) |
| O(3)-La(1)-O(12) | 141.13(14) | O(11)-La(2)-O(10) | 116.09(12) | O(15)-La(3)-N(11) | 161.25(14) |
| O(3)-La(1)-O(13) | 69.74(14)  | O(11)-La(2)-O(14) | 61.18(13)  | O(16)-La(3)-O(9)  | 72.70(15)  |
| O(3)-La(1)-N(1)  | 57.64(15)  | O(11)-La(2)-O(15) | 165.70(12) | O(16)-La(3)-O(15) | 59.85(13)  |
| O(3)-La(1)-N(3)  | 74.37(15)  | O(11)-La(2)-O(17) | 64.78(12)  | O(16)-La(3)-N(9)  | 138.08(15) |
| O(6)-La(1)-O(3)  | 70.19(14)  | O(11)-La(2)-N(5)  | 60.74(14)  | O(16)-La(3)-N(11) | 123.20(14) |
| O(6)-La(1)-O(7)  | 98.66(14)  | O(11)-La(2)-N(8)  | 107.67(14) | O(18)-La(3)-O(9)  | 117.77(13) |
| O(6)-La(1)-O(11) | 71.01(13)  | O(14)-La(2)-O(5)  | 75.08(13)  | O(18)-La(3)-O(10) | 68.10(13)  |
| O(6)-La(1)-O(12) | 127.95(13) | O(14)-La(2)-O(10) | 155.00(12) | O(18)-La(3)-O(15) | 70.85(12)  |
| O(6)-La(1)-O(13) | 115.46(13) | O(14)-La(2)-O(17) | 119.35(12) | O(18)-La(3)-O(16) | 129.22(13) |
| O(6)-La(1)-O(14) | 67.14(13)  | O(15)-La(2)-O(5)  | 64.57(12)  | O(18)-La(3)-O(19) | 100.03(13) |
| O(6)-La(1)-N(1)  | 113.83(14) | O(15)-La(2)-O(10) | 60.03(13)  | O(18)-La(3)-O(22) | 165.93(13) |

|                   |            |                   |            |                   |            |
|-------------------|------------|-------------------|------------|-------------------|------------|
| O(6)-La(1)-N(3)   | 61.65(14)  | O(15)-La(2)-O(14) | 115.73(13) | O(18)-La(3)-O(23) | 70.65(13)  |
| O(7)-La(1)-O(11)  | 76.45(13)  | O(15)-La(2)-O(17) | 123.27(13) | O(18)-La(3)-N(9)  | 61.28(13)  |
| O(7)-La(1)-O(12)  | 86.06(14)  | O(15)-La(2)-N(5)  | 107.08(14) | O(18)-La(3)-N(11) | 107.35(14) |
| O(7)-La(1)-O(13)  | 145.78(14) | O(15)-La(2)-N(8)  | 60.53(14)  | O(19)-La(3)-O(9)  | 141.90(13) |
| O(7)-La(1)-N(1)   | 85.94(14)  | O(17)-La(2)-O(5)  | 118.23(12) | O(19)-La(3)-O(15) | 75.94(13)  |
| O(7)-La(1)-N(3)   | 57.46(14)  | O(18)-La(2)-O(5)  | 72.15(13)  | O(19)-La(3)-O(16) | 80.10(14)  |
| O(11)-La(1)-O(12) | 59.80(12)  | O(18)-La(2)-O(6)  | 75.58(13)  | O(19)-La(3)-O(23) | 135.86(14) |
| O(11)-La(1)-O(13) | 111.18(13) | O(18)-La(2)-O(10) | 65.97(12)  | O(19)-La(3)-N(9)  | 58.23(14)  |
| O(11)-La(1)-N(1)  | 162.33(14) | O(18)-La(2)-O(11) | 120.86(13) | O(19)-La(3)-N(11) | 86.22(14)  |
| O(11)-La(1)-N(3)  | 103.58(14) | O(18)-La(2)-O(14) | 138.38(13) | O(22)-La(3)-O(9)  | 72.57(14)  |
| O(12)-La(1)-N(1)  | 118.21(14) | O(18)-La(2)-O(15) | 71.39(13)  | O(22)-La(3)-O(10) | 125.85(13) |
| O(12)-La(1)-N(3)  | 143.33(14) | O(18)-La(2)-O(17) | 59.15(13)  | O(22)-La(3)-O(15) | 115.86(13) |
| O(13)-La(1)-O(12) | 71.41(13)  | O(18)-La(2)-N(5)  | 123.42(14) | O(22)-La(3)-O(16) | 61.32(13)  |
| O(13)-La(1)-N(1)  | 82.70(14)  | O(18)-La(2)-N(8)  | 131.47(14) | O(22)-La(3)-O(19) | 71.11(14)  |
| O(13)-La(1)-N(3)  | 141.81(14) | N(5)-La(2)-O(5)   | 160.56(14) | O(22)-La(3)-O(23) | 107.67(14) |
| O(14)-La(1)-O(3)  | 85.00(14)  | N(5)-La(2)-O(10)  | 65.88(14)  | O(22)-La(3)-N(9)  | 104.69(14) |
| O(14)-La(1)-O(7)  | 138.28(14) | N(5)-La(2)-O(14)  | 94.79(14)  | O(22)-La(3)-N(11) | 62.06(15)  |
| O(14)-La(1)-O(11) | 61.88(13)  | N(5)-La(2)-O(17)  | 81.17(14)  | O(23)-La(3)-O(9)  | 67.27(14)  |
| O(14)-La(1)-O(12) | 75.28(13)  | N(8)-La(2)-O(5)   | 81.53(15)  | O(23)-La(3)-O(15) | 133.58(13) |
| O(14)-La(1)-O(13) | 60.96(13)  | N(8)-La(2)-O(10)  | 93.72(14)  | O(23)-La(3)-O(16) | 139.86(14) |
| O(14)-La(1)-N(1)  | 135.76(14) | N(8)-La(2)-O(14)  | 66.00(14)  | O(23)-La(3)-N(9)  | 81.02(14)  |
| O(14)-La(1)-N(3)  | 128.60(14) | N(8)-La(2)-O(17)  | 160.04(15) | O(23)-La(3)-N(11) | 58.30(14)  |

| <b>D—H<math>\cdots</math>A</b>      | <b>Distance(D—H)</b> | <b>Distance(H<math>\cdots</math>A)</b> | <b>Distance (D<math>\cdots</math>A)</b> | <b>Angles(D—H<math>\cdots</math>A)</b> |
|-------------------------------------|----------------------|----------------------------------------|-----------------------------------------|----------------------------------------|
| O(8)-H(8)...O(22) <sup>i</sup>      | 0.82                 | 1.92                                   | 2.738(6)                                | 173.6                                  |
| O(20)-H(20)...N(6) <sup>ii</sup>    | 0.82                 | 2.03                                   | 2.844(7)                                | 174.0                                  |
| O(24)-H(24)...O(33)                 | 0.82                 | 1.99                                   | 2.733(9)                                | 149.8                                  |
| N(10)-H(10)...O(31) <sup>iii</sup>  | 0.86                 | 2.00                                   | 2.811(9)                                | 155.9                                  |
| O(25)-H(25B)...O(26)                | 0.83                 | 1.92                                   | 2.743(17)                               | 169.7                                  |
| O(26)-H(26A)...O(35)                | 0.85                 | 2.03                                   | 2.83(2)                                 | 156.2                                  |
| O(27)-H(27A)...N(16) <sup>iv</sup>  | 0.87                 | 2.17                                   | 2.790(17)                               | 128.0                                  |
| O(31)-H(31A)...O(27) <sup>v</sup>   | 0.85                 | 2.34                                   | 2.862(15)                               | 120.5                                  |
| O(31)-H(31B)...O(32)                | 0.81                 | 1.95                                   | 2.738(13)                               | 162.0                                  |
| O(32)-H(32E)...N(7) <sup>i</sup>    | 0.90                 | 1.89                                   | 2.789(9)                                | 176.2                                  |
| O(33)-H(33A)...O(35)                | 0.85                 | 2.13                                   | 2.775(15)                               | 132.4                                  |
| O(34)-H(34A)...O(36)                | 0.85                 | 1.97                                   | 2.71(3)                                 | 144.4                                  |
| O(35)-H(35A)...O(28) <sup>v</sup>   | 0.86                 | 1.98                                   | 2.80(2)                                 | 160.3                                  |
| O(35)-H(35B)...O(34) <sup>iii</sup> | 0.85                 | 2.26                                   | 2.87(2)                                 | 128.3                                  |

|                                                                                                                                                                 |      |      |           |       |
|-----------------------------------------------------------------------------------------------------------------------------------------------------------------|------|------|-----------|-------|
| O(36)-H(36A)...O(32)                                                                                                                                            | 0.80 | 2.03 | 2.815(16) | 166.3 |
| Symmetry codes: (i) $-x+3/2, -y+1, z-1/2$ ; (ii) $-x+2, y+1/2, -z+3/2$ ; (iii) $x+1/2, -y+3/2, -z+1$ ; (iv) $-x+1, y+1/2, -z+3/2$ ; (v) $x-1/2, -y+3/2, -z+1$ . |      |      |           |       |

| Complex 2a        |           |                   |           |                   |           |
|-------------------|-----------|-------------------|-----------|-------------------|-----------|
| Dy(1)-O(7)        | 2.380(12) | Dy(2)-O(11)       | 2.195(12) | Dy(3)-O(10)       | 2.342(13) |
| Dy(1)-O(2)        | 2.319(13) | Dy(2)-O(7)        | 2.411(13) | Dy(3)-O(10)       | 2.342(13) |
| Dy(1)-O(13)       | 2.378(12) | Dy(2)-O(10)       | 2.317(11) | Dy(3)-O(16)       | 2.323(12) |
| Dy(1)-O(6)        | 2.411(12) | Dy(2)-O(16)       | 2.253(13) | Dy(3)-O(16)       | 2.323(12) |
| Dy(1)-O(3)        | 2.232(13) | Dy(2)-O(2)        | 2.312(13) | Dy(3)-O(9)        | 2.220(13) |
| Dy(1)-O(17)       | 2.315(12) | Dy(2)-O(8)        | 2.454(15) | Dy(3)-O(9)        | 2.220(13) |
| Dy(1)-N(2)        | 2.503(16) | Dy(2)-O(1)        | 2.398(14) | Dy(3)-O(15)       | 2.448(14) |
| Dy(1)-N(4)        | 2.473(16) | Dy(2)-N(6)        | 2.496(16) | Dy(3)-O(15)       | 2.448(14) |
| O(7)-Dy(1)-O(6)   | 124.0(4)  | O(11)-Dy(2)-O(7)  | 87.4(4)   | O(10)-Dy(3)-O(10) | 143.5(6)  |
| O(7)-Dy(1)-N(2)   | 72.6(5)   | O(11)-Dy(2)-O(10) | 138.5(4)  | O(10)-Dy(3)-O(15) | 119.1(4)  |
| O(7)-Dy(1)-N(4)   | 137.3(5)  | O(11)-Dy(2)-O(16) | 155.7(4)  | O(10)-Dy(3)-O(15) | 88.3(4)   |
| O(2)-Dy(1)-O(7)   | 73.5(4)   | O(11)-Dy(2)-O(2)  | 82.9(4)   | O(10)-Dy(3)-O(15) | 119.1(4)  |
| O(2)-Dy(1)-O(13)  | 75.7(4)   | O(11)-Dy(2)-O(8)  | 82.8(5)   | O(10)-Dy(3)-O(15) | 88.3(4)   |
| O(2)-Dy(1)-O(6)   | 142.6(5)  | O(11)-Dy(2)-O(1)  | 104.1(4)  | O(16)-Dy(3)-O(10) | 64.2(4)   |
| O(2)-Dy(1)-N(2)   | 145.8(5)  | O(11)-Dy(2)-N(6)  | 74.7(5)   | O(16)-Dy(3)-O(10) | 64.2(4)   |
| O(2)-Dy(1)-N(4)   | 64.9(5)   | O(7)-Dy(2)-O(8)   | 65.6(4)   | O(16)-Dy(3)-O(10) | 136.2(5)  |
| O(13)-Dy(1)-O(7)  | 70.6(4)   | O(7)-Dy(2)-N(6)   | 143.7(5)  | O(16)-Dy(3)-O(10) | 136.2(5)  |
| O(13)-Dy(1)-O(6)  | 138.9(4)  | O(10)-Dy(2)-O(7)  | 119.3(4)  | O(16)-Dy(3)-O(16) | 125.4(6)  |
| O(13)-Dy(1)-N(2)  | 89.1(5)   | O(10)-Dy(2)-O(8)  | 81.0(5)   | O(16)-Dy(3)-O(15) | 84.7(4)   |
| O(13)-Dy(1)-N(4)  | 106.4(5)  | O(10)-Dy(2)-O(1)  | 78.9(4)   | O(16)-Dy(3)-O(15) | 84.7(4)   |
| O(6)-Dy(1)-N(2)   | 64.7(5)   | O(10)-Dy(2)-N(6)  | 65.1(4)   | O(16)-Dy(3)-O(15) | 54.8(4)   |
| O(6)-Dy(1)-N(4)   | 87.2(5)   | O(16)-Dy(2)-O(7)  | 74.0(4)   | O(16)-Dy(3)-O(15) | 54.8(4)   |
| O(3)-Dy(1)-O(7)   | 141.1(4)  | O(16)-Dy(2)-O(10) | 65.7(4)   | O(9)-Dy(3)-O(10)  | 68.6(4)   |
| O(3)-Dy(1)-O(2)   | 116.6(5)  | O(16)-Dy(2)-O(2)  | 76.8(4)   | O(9)-Dy(3)-O(10)  | 84.6(5)   |
| O(3)-Dy(1)-O(13)  | 75.9(4)   | O(16)-Dy(2)-O(8)  | 103.0(5)  | O(9)-Dy(3)-O(10)  | 84.6(5)   |
| O(3)-Dy(1)-O(6)   | 72.4(5)   | O(16)-Dy(2)-O(1)  | 80.3(5)   | O(9)-Dy(3)-O(10)  | 68.6(4)   |
| O(3)-Dy(1)-O(17)  | 134.6(5)  | O(16)-Dy(2)-N(6)  | 129.3(5)  | O(9)-Dy(3)-O(16)  | 132.9(5)  |
| O(3)-Dy(1)-N(2)   | 88.1(6)   | O(2)-Dy(2)-O(7)   | 73.0(4)   | O(9)-Dy(3)-O(16)  | 89.4(5)   |
| O(3)-Dy(1)-N(4)   | 70.8(5)   | O(2)-Dy(2)-O(10)  | 132.9(5)  | O(9)-Dy(3)-O(16)  | 89.4(5)   |
| O(17)-Dy(1)-O(7)  | 82.8(4)   | O(2)-Dy(2)-O(8)   | 136.6(4)  | O(9)-Dy(3)-O(16)  | 132.9(5)  |
| O(17)-Dy(1)-O(2)  | 79.7(4)   | O(2)-Dy(2)-O(1)   | 67.2(4)   | O(9)-Dy(3)-O(9)   | 86.2(7)   |
| O(17)-Dy(1)-O(13) | 147.8(4)  | O(2)-Dy(2)-N(6)   | 133.4(5)  | O(9)-Dy(3)-O(15)  | 94.2(5)   |
| O(17)-Dy(1)-O(6)  | 71.4(4)   | O(8)-Dy(2)-N(6)   | 80.7(5)   | O(9)-Dy(3)-O(15)  | 94.2(5)   |

|                                 |                      |                        |                         |                        |          |
|---------------------------------|----------------------|------------------------|-------------------------|------------------------|----------|
| O(17)-Dy(1)-N(2)                | 100.2(5)             | O(1)-Dy(2)-O(7)        | 136.5(4)                | O(9)-Dy(3)-O(15)       | 172.3(4) |
| O(17)-Dy(1)-N(4)                | 80.9(5)              | O(1)-Dy(2)-O(8)        | 156.2(4)                | O(9)-Dy(3)-O(15)       | 172.3(5) |
| N(4)-Dy(1)-N(2)                 | 149.3(5)             | O(1)-Dy(2)-N(6)        | 79.3(5)                 | O(15)-Dy(3)-O(15)      | 86.5(6)  |
| O(7)-Dy(1)-O(6)                 | 124.0(4)             | O(11)-Dy(2)-O(7)       | 87.4(4)                 | O(10)-Dy(3)-O(10)      | 143.5(6) |
| O(7)-Dy(1)-N(2)                 | 72.6(5)              | O(11)-Dy(2)-O(10)      | 138.5(4)                | O(10)-Dy(3)-O(15)      | 119.1(4) |
| O(7)-Dy(1)-N(4)                 | 137.3(5)             | O(11)-Dy(2)-O(16)      | 155.7(4)                | O(10)-Dy(3)-O(15)      | 88.3(4)  |
| O(2)-Dy(1)-O(7)                 | 73.5(4)              | O(11)-Dy(2)-O(2)       | 82.9(4)                 | O(10)-Dy(3)-O(15)      | 119.1(4) |
| O(2)-Dy(1)-O(13)                | 75.7(4)              | O(11)-Dy(2)-O(8)       | 82.8(5)                 | O(10)-Dy(3)-O(15)      | 88.3(4)  |
| O(2)-Dy(1)-O(6)                 | 142.6(5)             | O(11)-Dy(2)-O(1)       | 104.1(4)                | O(16)-Dy(3)-O(10)      | 64.2(4)  |
| <b>D—H···A</b>                  | <b>Distance(D—H)</b> | <b>Distance(H···A)</b> | <b>Distance (D···A)</b> | <b>Angles(D—H···A)</b> |          |
| O(13)-H(13A)...O(11)            | 0.87                 | 2.25                   | 3.061(18)               | 154.6                  |          |
| O(13)-H(13A)...O(12)            | 0.87                 | 2.40                   | 2.965(18)               | 123.3                  |          |
| O(13)-H(13B)...O(14)            | 0.87                 | 1.86                   | 2.665(14)               | 152.4                  |          |
| O(1)-H(1)...O(9) <sup>i</sup>   | 0.861(14)            | 1.82(10)               | 2.489(17)               | 134(11)                |          |
| O(5)-H(5)...N(1) <sup>iii</sup> | 0.80                 | 2.17                   | 2.95(3)                 | 163.2                  |          |
| N(7)-H(7)...O(15) <sup>i</sup>  | 0.98                 | 1.66                   | 2.63(2)                 | 166.7                  |          |
| N(7)-H(7)...O(17) <sup>i</sup>  | 0.98                 | 2.47                   | 3.14(2)                 | 125.5                  |          |
| N(7)-H(7)...N(8) <sup>i</sup>   | 0.98                 | 2.31                   | 3.22(3)                 | 155.0                  |          |
| O(14)-H(14)...O(3)              | 0.86                 | 2.08                   | 2.681(13)               | 126.8                  |          |
| O(14)-H(14)...O(4)              | 0.86                 | 2.39                   | 3.21(3)                 | 160.4                  |          |

Symmetry codes: (i)  $y, x, -z-1$ ; (ii)  $y, x, -z-2$  (iii)  $-x-1, -y-1, z$ .

| <b>Complex 2b</b> |           |                   |          |                   |          |
|-------------------|-----------|-------------------|----------|-------------------|----------|
| Dy(1)-O(7)        | 2.406(8)  | Dy(2)-O(11)       | 2.204(7) | Dy(3)-O(10)       | 2.361(8) |
| Dy(1)-O(2)        | 2.336(7)  | Dy(2)-O(7)        | 2.407(8) | Dy(3)-O(10)       | 2.361(8) |
| Dy(1)-O(13)       | 2.399(8)  | Dy(2)-O(10)       | 2.329(7) | Dy(3)-O(16)       | 2.306(7) |
| Dy(1)-O(6)        | 2.412(8)  | Dy(2)-O(16)       | 2.285(8) | Dy(3)-O(16)       | 2.306(7) |
| Dy(1)-O(3)        | 2.253(7)  | Dy(2)-O(2)        | 2.331(9) | Dy(3)-O(9)        | 2.255(9) |
| Dy(1)-O(17)       | 2.327(7)  | Dy(2)-O(8)        | 2.470(9) | Dy(3)-O(9)        | 2.255(9) |
| Dy(1)-N(2)        | 2.491(11) | Dy(2)-O(1)        | 2.427(9) | Dy(3)-O(15)       | 2.471(9) |
| O(7)-Dy(1)-O(6)   | 123.0(3)  | O(11)-Dy(2)-O(7)  | 87.1(3)  | O(10)-Dy(3)-O(10) | 141.8(4) |
| O(7)-Dy(1)-N(2)   | 72.1(3)   | O(11)-Dy(2)-O(10) | 137.9(3) | O(10)-Dy(3)-O(15) | 88.5(3)  |
| O(7)-Dy(1)-N(4)   | 137.1(3)  | O(11)-Dy(2)-O(16) | 155.4(3) | O(10)-Dy(3)-O(15) | 88.5(3)  |
| O(2)-Dy(1)-O(7)   | 74.4(3)   | O(11)-Dy(2)-O(2)  | 83.2(3)  | O(10)-Dy(3)-O(15) | 120.0(3) |
| O(2)-Dy(1)-O(13)  | 75.4(3)   | O(11)-Dy(2)-O(8)  | 82.1(3)  | O(10)-Dy(3)-O(15) | 120.0(3) |
| O(2)-Dy(1)-O(6)   | 142.7(3)  | O(11)-Dy(2)-O(1)  | 104.6(3) | O(16)-Dy(3)-O(10) | 136.0(3) |
| O(2)-Dy(1)-N(2)   | 146.1(3)  | O(11)-Dy(2)-N(6)  | 74.8(3)  | O(16)-Dy(3)-O(10) | 65.7(3)  |
| O(2)-Dy(1)-N(4)   | 63.8(3)   | O(7)-Dy(2)-O(8)   | 65.4(3)  | O(16)-Dy(3)-O(10) | 136.0(3) |

|                   |          |                   |          |                   |          |
|-------------------|----------|-------------------|----------|-------------------|----------|
| O(13)-Dy(1)-O(7)  | 70.2(3)  | O(7)-Dy(2)-O(1)   | 137.0(3) | O(16)-Dy(3)-O(10) | 65.7(3)  |
| O(13)-Dy(1)-O(6)  | 139.4(3) | O(7)-Dy(2)-N(6)   | 142.8(4) | O(16)-Dy(3)-O(16) | 124.0(4) |
| O(13)-Dy(1)-N(2)  | 88.9(3)  | O(10)-Dy(2)-O(7)  | 119.5(3) | O(16)-Dy(3)-O(15) | 54.3(3)  |
| O(13)-Dy(1)-N(4)  | 106.5(3) | O(10)-Dy(2)-O(2)  | 132.7(3) | O(16)-Dy(3)-O(15) | 54.3(3)  |
| O(6)-Dy(1)-N(2)   | 64.5(3)  | O(10)-Dy(2)-O(8)  | 81.1(3)  | O(16)-Dy(3)-O(15) | 84.4(3)  |
| O(6)-Dy(1)-N(4)   | 88.2(4)  | O(10)-Dy(2)-O(1)  | 78.7(3)  | O(16)-Dy(3)-O(15) | 84.4(3)  |
| O(3)-Dy(1)-O(7)   | 141.0(3) | O(10)-Dy(2)-N(6)  | 64.3(3)  | O(9)-Dy(3)-O(10)  | 83.8(3)  |
| O(3)-Dy(1)-O(2)   | 115.8(3) | O(16)-Dy(2)-O(7)  | 73.9(3)  | O(9)-Dy(3)-O(10)  | 68.2(3)  |
| O(3)-Dy(1)-O(13)  | 76.2(3)  | O(16)-Dy(2)-O(10) | 66.5(3)  | O(9)-Dy(3)-O(10)  | 68.2(3)  |
| O(3)-Dy(1)-O(6)   | 73.1(3)  | O(16)-Dy(2)-O(2)  | 76.8(3)  | O(9)-Dy(3)-O(10)  | 83.8(3)  |
| O(3)-Dy(1)-O(17)  | 135.0(3) | O(16)-Dy(2)-O(8)  | 103.1(3) | O(9)-Dy(3)-O(16)  | 133.8(3) |
| O(3)-Dy(1)-N(2)   | 88.2(3)  | O(16)-Dy(2)-O(1)  | 80.5(3)  | O(9)-Dy(3)-O(16)  | 89.9(3)  |
| O(3)-Dy(1)-N(4)   | 71.3(3)  | O(16)-Dy(2)-N(6)  | 129.6(3) | O(9)-Dy(3)-O(16)  | 133.8(3) |
| O(17)-Dy(1)-O(7)  | 82.7(3)  | O(2)-Dy(2)-O(7)   | 74.5(3)  | O(9)-Dy(3)-O(16)  | 89.9(3)  |
| O(17)-Dy(1)-O(2)  | 79.1(3)  | O(2)-Dy(2)-O(8)   | 137.7(3) | O(9)-Dy(3)-O(9)   | 85.3(5)  |
| O(17)-Dy(1)-O(13) | 146.8(3) | O(2)-Dy(2)-O(1)   | 66.3(3)  | O(9)-Dy(3)-O(15)  | 171.8(3) |
| O(17)-Dy(1)-O(6)  | 71.9(3)  | O(2)-Dy(2)-N(6)   | 133.1(3) | O(9)-Dy(3)-O(15)  | 94.3(3)  |
| O(17)-Dy(1)-N(2)  | 101.1(3) | O(8)-Dy(2)-N(6)   | 79.9(4)  | O(9)-Dy(3)-O(15)  | 171.8(3) |
| O(17)-Dy(1)-N(4)  | 80.3(3)  | O(1)-Dy(2)-O(8)   | 156.0(3) | O(9)-Dy(3)-O(15)  | 94.3(3)  |
| N(4)-Dy(1)-N(2)   | 150.0(4) | O(1)-Dy(2)-N(6)   | 79.7(4)  | O(15)-Dy(3)-O(15) | 87.2(4)  |
| O(7)-Dy(1)-O(6)   | 123.0(3) | O(11)-Dy(2)-O(7)  | 87.1(3)  | O(10)-Dy(3)-O(10) | 141.8(4) |
| O(7)-Dy(1)-N(2)   | 72.1(3)  | O(11)-Dy(2)-O(10) | 137.9(3) | O(10)-Dy(3)-O(15) | 88.5(3)  |
| O(7)-Dy(1)-N(4)   | 137.1(3) | O(11)-Dy(2)-O(16) | 155.4(3) | O(10)-Dy(3)-O(15) | 88.5(3)  |
| O(2)-Dy(1)-O(7)   | 74.4(3)  | O(11)-Dy(2)-O(2)  | 83.2(3)  | O(10)-Dy(3)-O(15) | 120.0(3) |
| O(2)-Dy(1)-O(13)  | 75.4(3)  | O(11)-Dy(2)-O(8)  | 82.1(3)  | O(10)-Dy(3)-O(15) | 120.0(3) |
| O(2)-Dy(1)-O(6)   | 142.7(3) | O(11)-Dy(2)-O(1)  | 104.6(3) | O(16)-Dy(3)-O(10) | 136.0(3) |

| <b>D—H···A</b>                 | <b>Distance(D—H)</b> | <b>Distance(H···A)</b> | <b>Distance (D···A)</b> | <b>Angles(D—H···A)</b> |
|--------------------------------|----------------------|------------------------|-------------------------|------------------------|
| O(13)-H(13A)...O(11)           | 0.87                 | 2.21                   | 3.012(12)               | 153.9                  |
| O(13)-H(13A)...O(12)           | 0.87                 | 2.35                   | 2.916(12)               | 122.9                  |
| O(13)-H(13B)...O(14)           | 0.87                 | 1.87                   | 2.668(9)                | 151.7                  |
| N(7)-H(7)...O(15) <sup>i</sup> | 1.00                 | 1.65                   | 2.632(16)               | 167.0                  |
| N(7)-H(7)...O(17) <sup>i</sup> | 1.00                 | 2.44                   | 3.158(14)               | 128.1                  |
| N(7)-H(7)...N(8) <sup>i</sup>  | 1.00                 | 2.33                   | 3.273(19)               | 157.4                  |
| O(14)-H(14)...O(3)             | 0.86                 | 2.06                   | 2.661(9)                | 127.0                  |
| O(14)-H(14)...O(4)             | 0.86                 | 2.38                   | 3.209(17)               | 161.2                  |

Symmetry code: (i)  $y, x, -z+1$ ; (ii)  $y, x, -z+2$



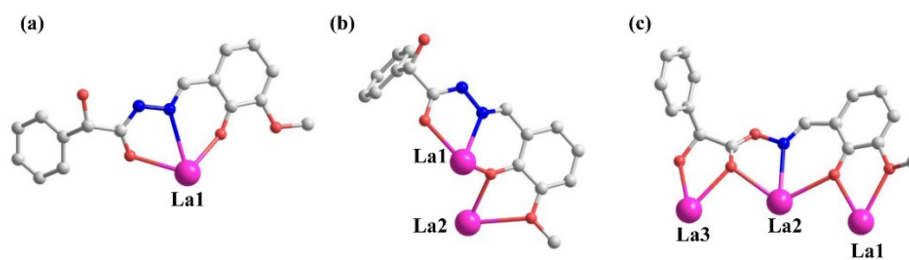

**Figure S1** Coordination modes of ligands in complex **1a**.

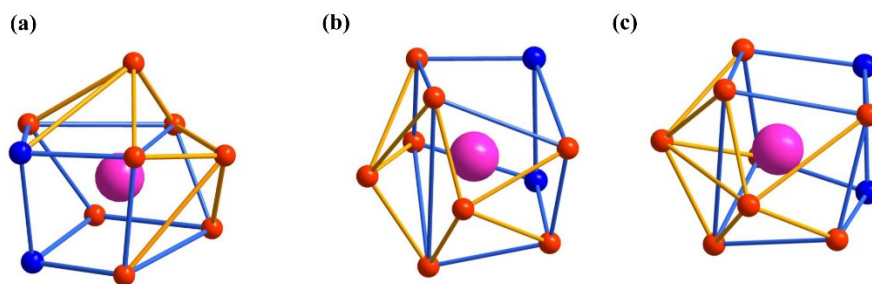

**Figure S2** Coordination polyhedron of (a) La1, (b) La2 and (c) La3 in complex **1a**.

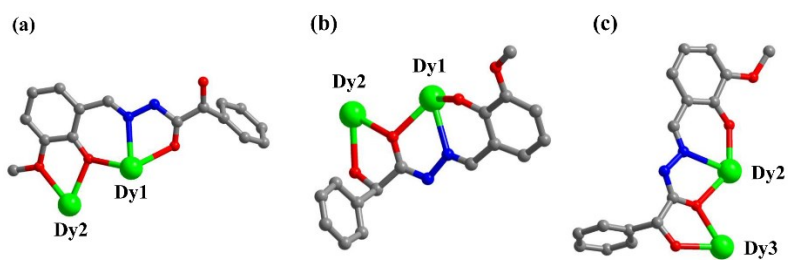

**Figure S3** Coordination modes of ligands in complex **2a**.

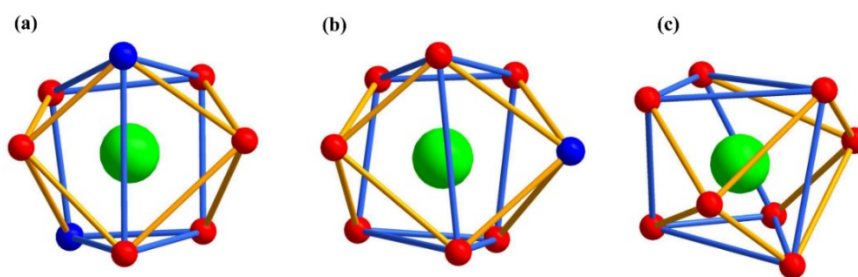

**Figure S4** Coordination polyhedron of (a) La1, (b) La2 and (c) La3 in complex **2a**.

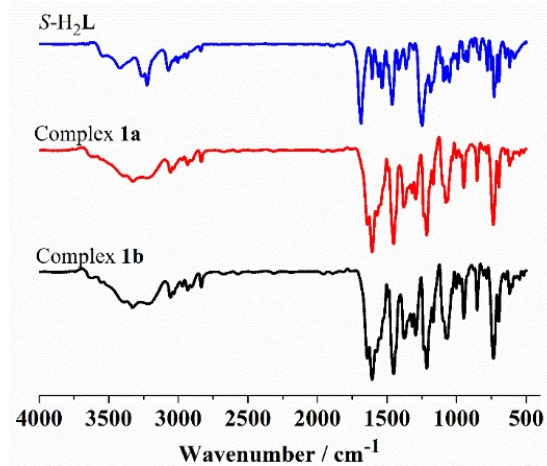

**Figure S5** IR spectrum of complex **1a** and **1b**.

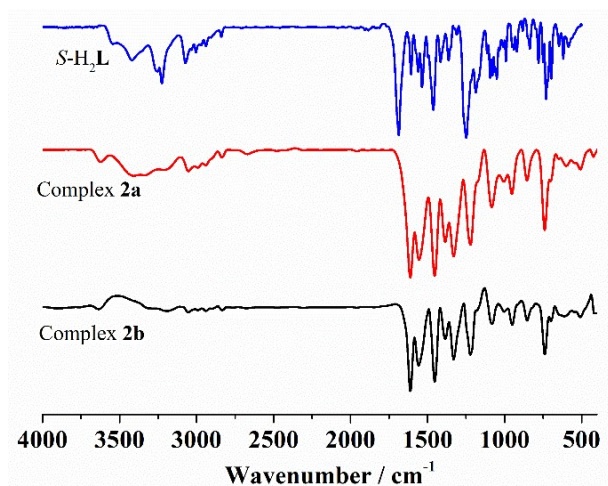

**Figure S6** IR spectrum of complex **2a** and **2b**.

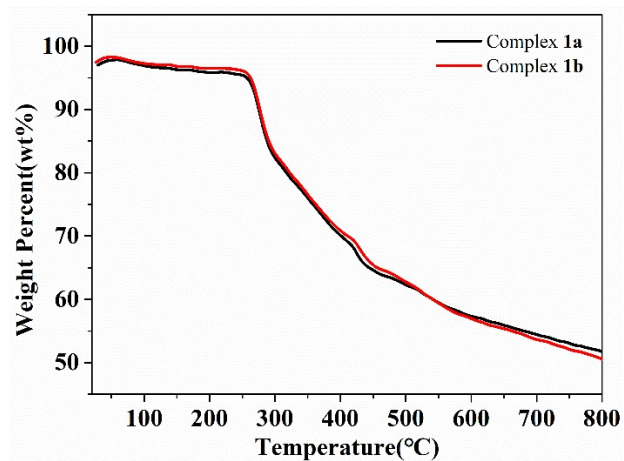

**Figure S7** TGA spectra of complex **1a** and **1b**.

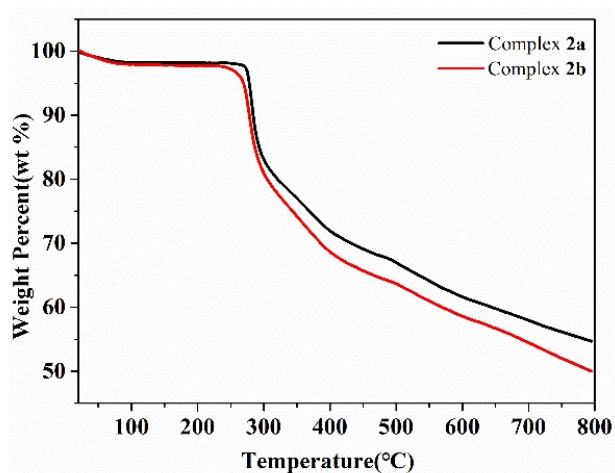

Figure S8 TGA spectra of complex 2a and 2b.

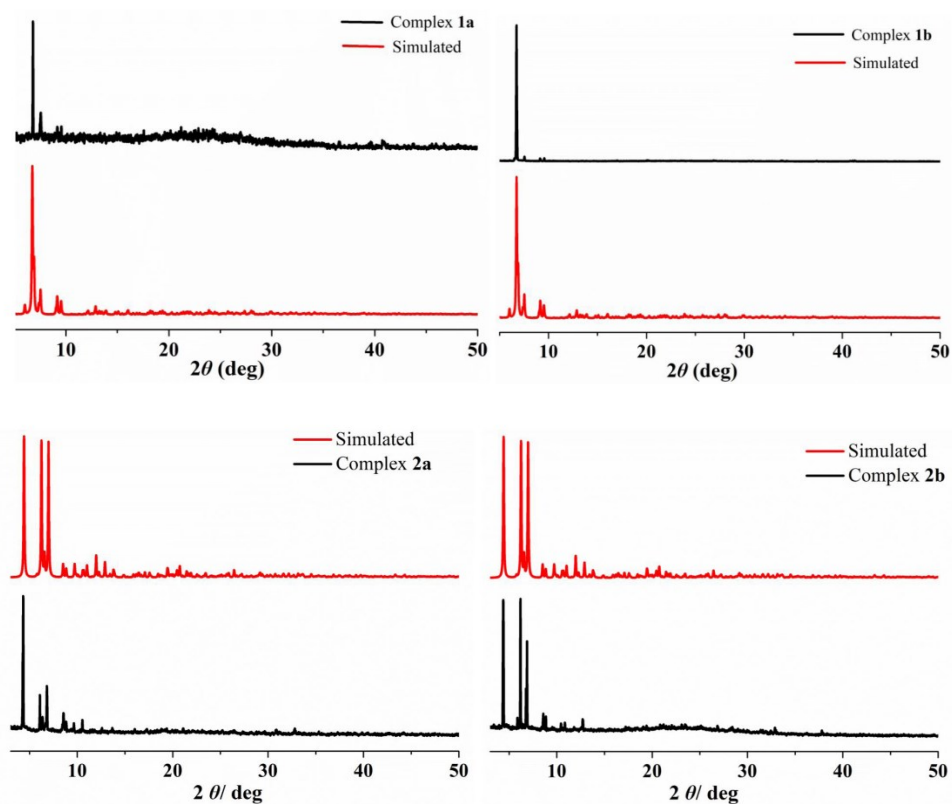

Figure S9 Comparing the simulated PXRD with experimental patterns of complexes.

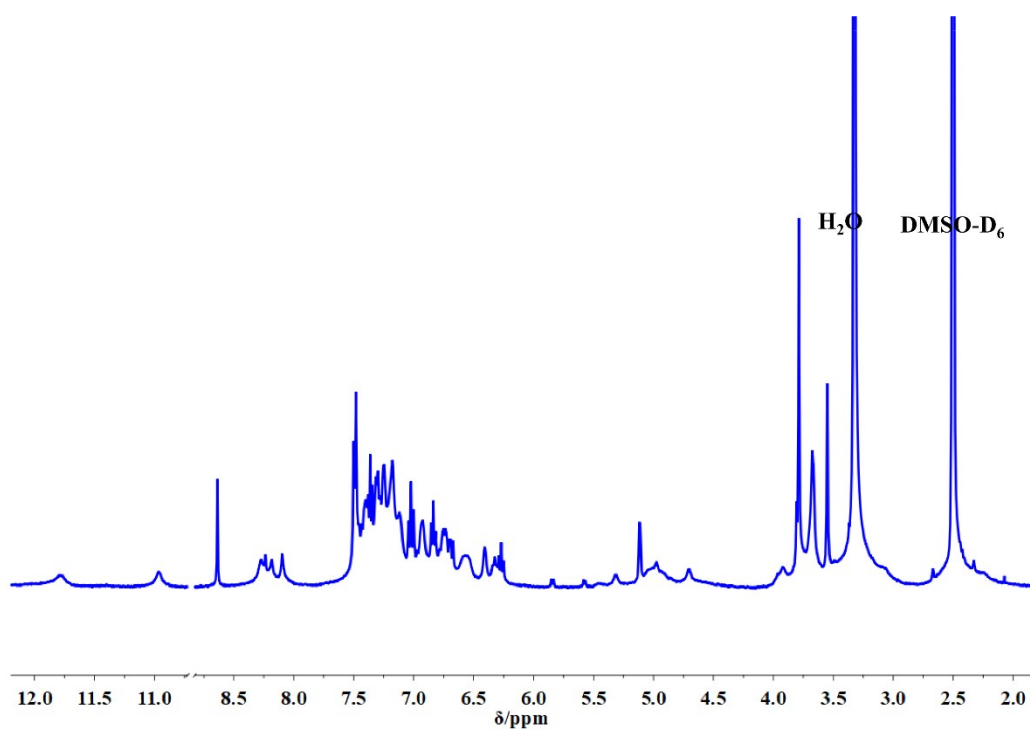

**Figure S10**  $^1\text{H}$ -NMR spectrum (400 MHz,  $\text{DMSO-d}_6$ ) of **1a**.

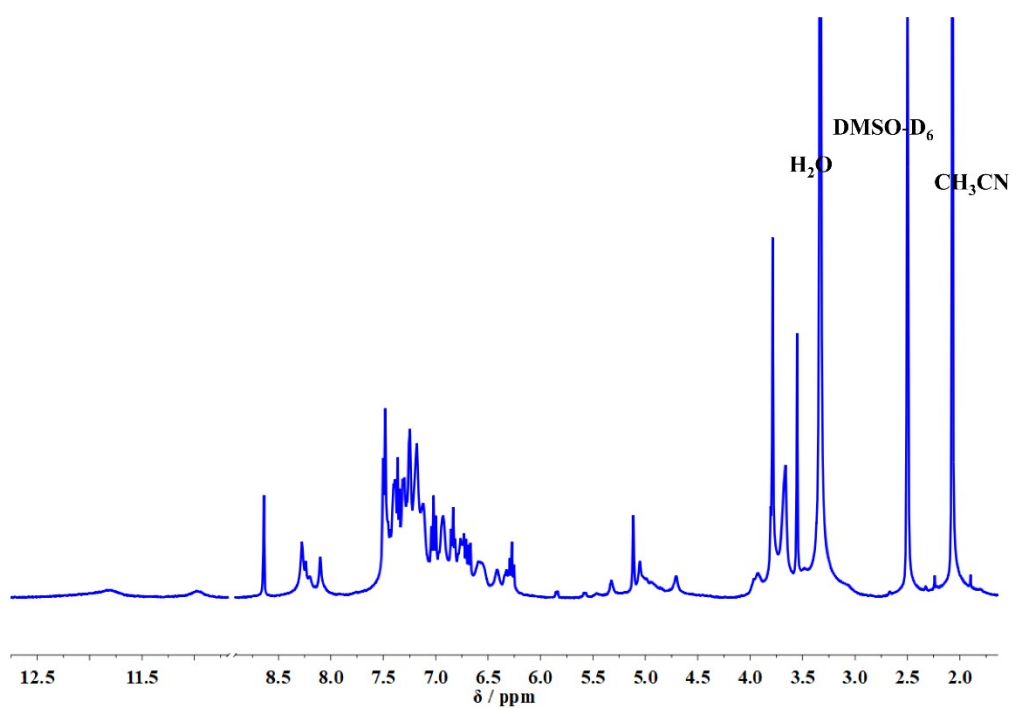

**Figure S11**  $^1\text{H}$ -NMR spectrum (400 MHz,  $\text{DMSO-d}_6$ ) of **1b**.

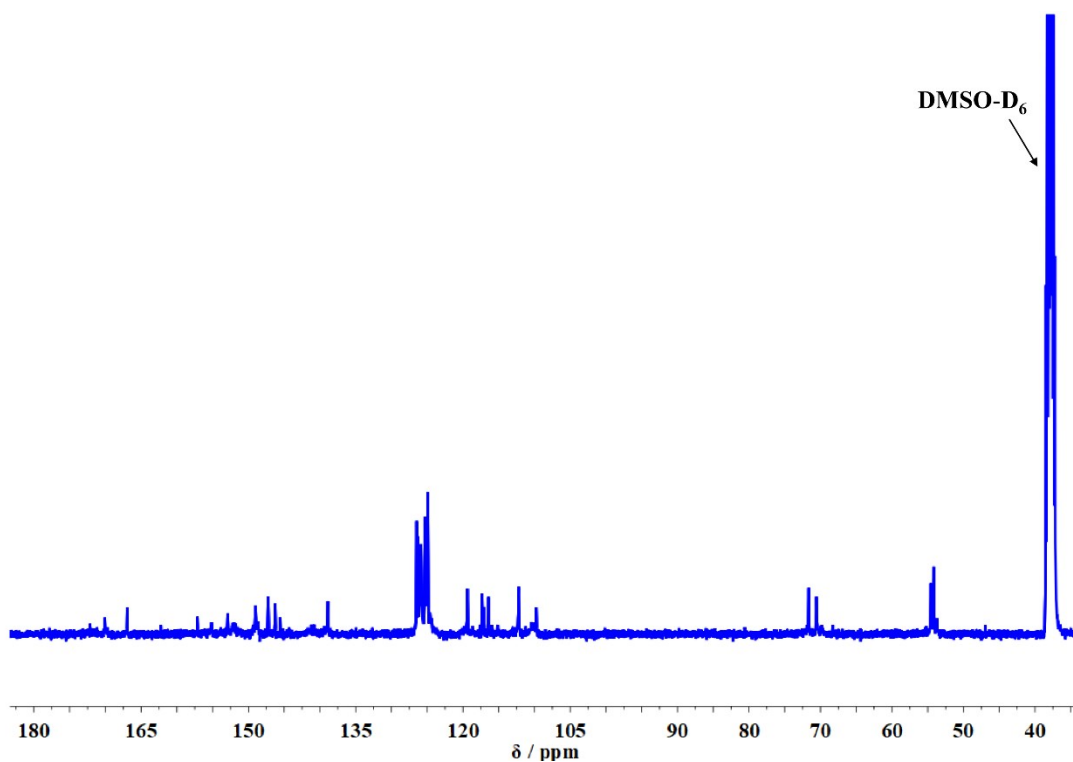

Figure S12  $^{13}\text{C}$ -NMR spectrum (400 MHz, DMSO-d<sub>6</sub>) of 1a.

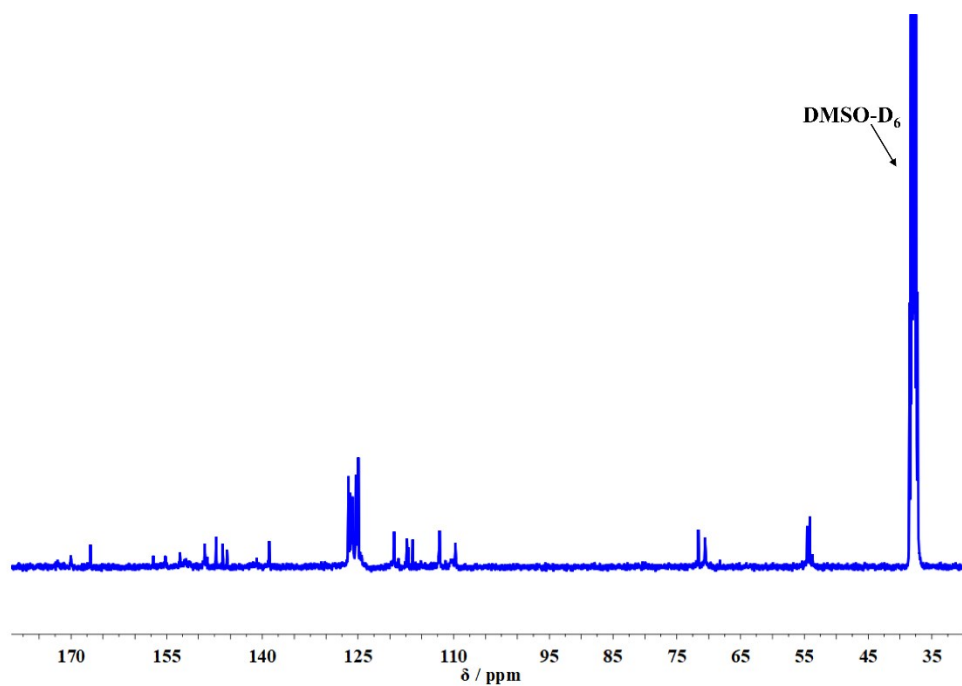

Figure S13  $^{13}\text{C}$ -NMR spectrum (400 MHz, DMSO-d<sub>6</sub>) of 1b.

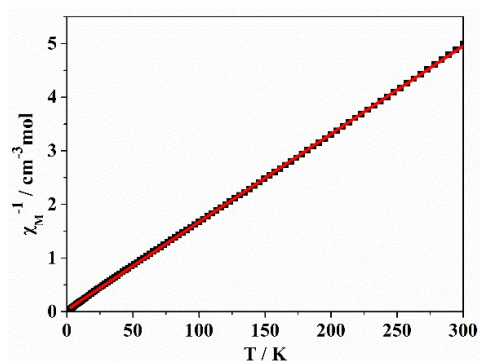

**Figure S14** The temperature dependence of  $\chi_M^{-1}$  for **2a**. The red line represents the best fit with Curie-Weiss law.

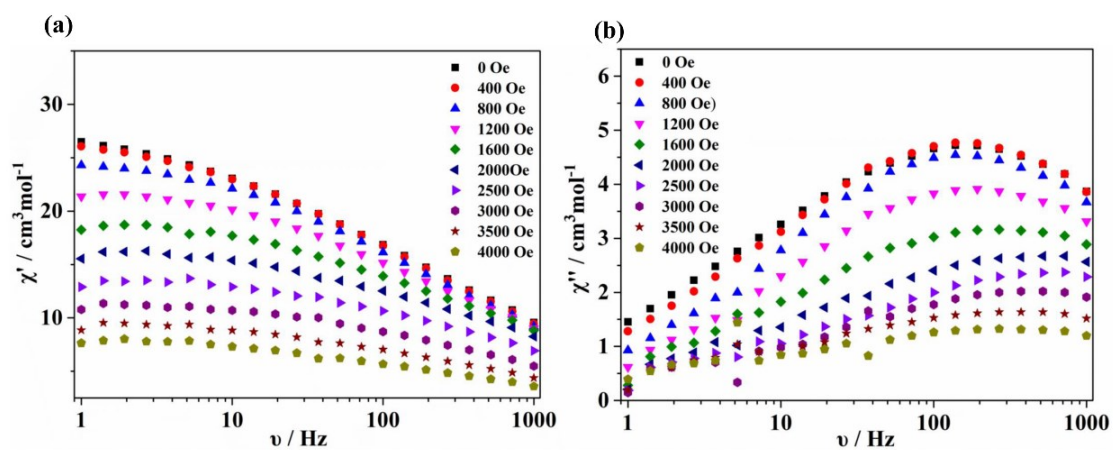

**Figure S15** Frequency dependence of the (a) in-phase ( $\chi'$ ) and (b) out-of-phase ( $\chi''$ ) magnetic susceptibilities of complex **2a** measured at 2.0 K in various applied fields from 0 to 4000 Oe.

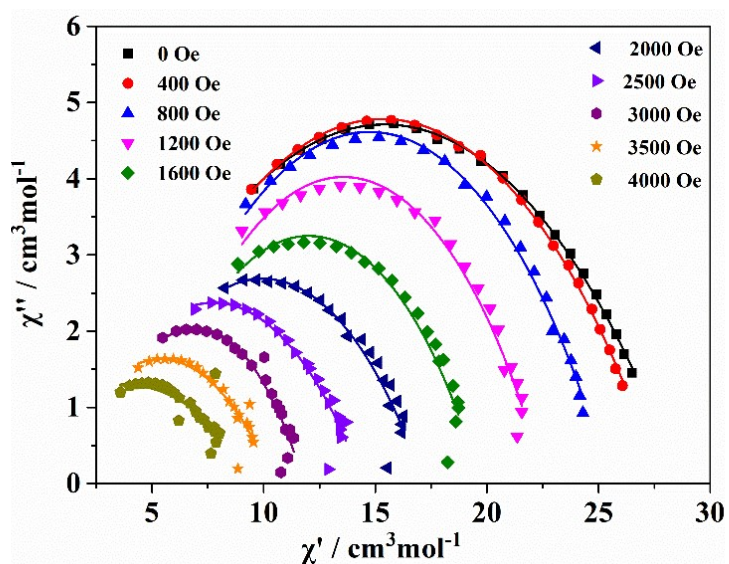

**Figure S16** Cole-Cole plots of **2a** at various applied fields from 0 to 4000 Oe.

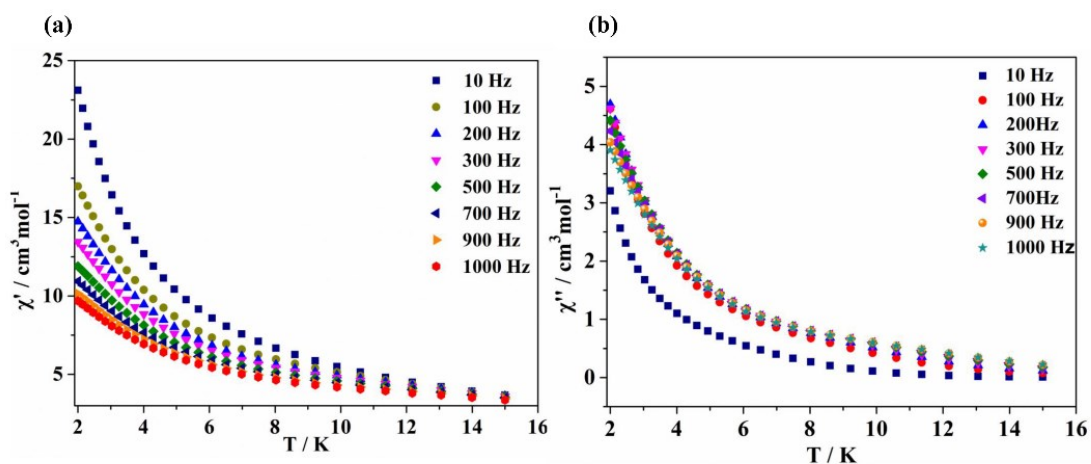

**Figure S17** Temperature dependence of ac susceptibility data for **2a** collected under 0 Oe dc field over the frequency from 1 to 999 Hz.

**Table S3** Relaxation fitting parameters from the least-square fitting of the Cole-Cole plots of **2a** under 2.0 K-15.0 K according to the generalized Debye model.

| T/K | $\chi_S$ | $\chi_T$ | $\tau$   | $\alpha$ |
|-----|----------|----------|----------|----------|
| 2.0 | 2.14E+00 | 2.85E+01 | 9.68E-04 | 5.65E-01 |
| 2.2 | 2.13E+00 | 2.60E+01 | 7.92E-04 | 5.60E-01 |
| 2.4 | 2.29E+00 | 2.38E+01 | 6.87E-04 | 5.52E-01 |
| 2.6 | 2.29E+00 | 2.20E+01 | 6.09E-04 | 5.51E-01 |
| 2.8 | 2.41E+00 | 2.04E+01 | 5.60E-04 | 5.47E-01 |
| 3.0 | 2.47E+00 | 1.91E+01 | 5.20E-04 | 5.45E-01 |
| 3.5 | 2.63E+00 | 1.63E+01 | 4.58E-04 | 5.42E-01 |
| 4.0 | 2.85E+00 | 1.42E+01 | 4.35E-04 | 5.39E-01 |
| 4.5 | 3.02E+00 | 1.26E+01 | 4.25E-04 | 5.37E-01 |
| 5.0 | 3.27E+00 | 1.13E+01 | 4.40E-04 | 5.25E-01 |
| 5.5 | 3.40E+00 | 1.02E+01 | 4.48E-04 | 5.15E-01 |
| 6.0 | 3.50E+00 | 9.36E+00 | 4.56E-04 | 5.02E-01 |
| 6.5 | 3.54E+00 | 8.61E+00 | 4.51E-04 | 4.85E-01 |
| 7.0 | 3.56E+00 | 7.97E+00 | 4.40E-04 | 4.67E-01 |
| 7.5 | 3.58E+00 | 7.40E+00 | 4.26E-04 | 4.43E-01 |
| 8.0 | 3.52E+00 | 6.93E+00 | 3.90E-04 | 4.29E-01 |
| 8.5 | 3.49E+00 | 6.51E+00 | 3.56E-04 | 4.10E-01 |
| 9.0 | 3.45E+00 | 6.13E+00 | 3.23E-04 | 3.88E-01 |
| 9.5 | 3.41E+00 | 5.81E+00 | 2.87E-04 | 3.73E-01 |
| 10  | 3.36E+00 | 5.51E+00 | 2.54E-04 | 3.56E-01 |
| 11  | 3.29E+00 | 5.00E+00 | 2.05E-04 | 3.20E-01 |
| 12  | 3.25E+00 | 4.59E+00 | 1.73E-04 | 2.82E-01 |
| 13  | 3.21E+00 | 4.24E+00 | 1.54E-04 | 2.46E-01 |
| 14  | 3.18E+00 | 3.94E+00 | 1.50E-04 | 2.06E-01 |
| 15  | 3.12E+00 | 3.68E+00 | 1.51E-04 | 1.64E-01 |
